# Supplementary material
Source: publisher site journal article supplement (https://www.dovepress.com/article/489113)
Supplement: Supplementary file 1 [file get_supplementary_file.php]

**Supplemental Tables**

**Table S1.** Histopathologic scoring of tissue sample.

| **Variables** | **Scores** | | | |
| --- | --- | --- | --- | --- |
| **0** | **1** | **2** | **3** |
| Re-epithelialization | None | Partial | Complete but immature or thin | Complete and mature |
| Inflammation cell infiltration | None | Scant | Moderate | Abundant |
| Fibroblast proliferation | None | Scant | Moderate | Abundant |
| Neovascularization | None | Up to five vessels per HPF | 6-19 vessels per HPF | More than 10 vessels per HPF |
| Granulation tissue fibroblast maturation | Immature | Mild Maturation | Moderate Maturation | Fully Matured |
| HPF, high-power field | | | | |

**Table S2.** Wound surface area of five experimental groups: SC, NC, VC, ST and CE. All data are given as mean ± S.E. for six animals in each group.

| **Groups** | **Wound surface area (mm)** | | | | | | |
| --- | --- | --- | --- | --- | --- | --- | --- |
| **Day 12** | **Day 13** | **Day 14** | **Day 15** | **Day 16** | **Day 17** | **Day 18** |
| **SC** | 2.66 ± 0.96 | 0.94 ± 0.48 | 0.32 ± 0.32 | 0.19 ± 0.19 | 0.00 ± 0.00 | 0.00 ± 0.00 | 0.00 ± 0.00 |
| **NC** | 8.63 ± 1.81 | 2.94 ± 1.00 | 1.64 ± 0.80 | 0.81 ± 0.48 | 0.30 ± 0.21 | 0.09 ± 0.09 | 0.00 ± 0.00 |
| **VC** | 9.83 ± 1.83 | 5.78 ± 1.32 | 3.16 ± 0.91 | 1.27 ± 0.50 | 0.19 ± 0.19 | 0.00 ± 0.00 | 0.00 ± 0.00 |
| **ST** | 12.37 ± 2.54 | 11.06 ± 2.66 | 7.05 ± 1.86 | 4.89 ± 1.38 | 1.92 ± 0.71 | 0.91 ± 0.48 | 0.36 ± 0.25 |
| **CE** | 0.00 ± 0.00 | 0.00 ± 0.00 | 0.00 ± 0.00 | 0.00 ± 0.00 | 0.00 ± 0.00 | 0.00 ± 0.00 | 0.00 ± 0.00 |

**Table S3.** Mean value of different serum biomarkers level such as AST, ALT, TC and TG of five experimental groups: SC, NC, VC, ST and CE. All data are given as mean ± S.E. for three animals in each group each day. Statistically significant results are indicated as (a) *p* < 0.001, SC *versus* NC, VC, ST and CE on the corresponding day; (b) *p* < 0.01, SC *versus* NC; *p* < 0.0001, SC *versus* VC and ST on the corresponding day; (c) ) *p* < 0.01, SC *versus* NC and VC; *p* < 0.05, SC *versus* ST and CE on the corresponding day; (d) *p* ≤ 0.01, SC *versus* NC, VC, ST and CE on the corresponding day; (e) *p* < 0.0001, SC *versus* NC, VC, ST and CE on the corresponding day; (f) *p* < 0.0001, SC *versus* NC, VC, ST and CE on the corresponding day; (g) *p* < 0.0001, SC *versus* NC, VC, ST and CE on the corresponding day; and (h) *p* < 0.0001, SC *versus* NC, VC, ST and CE on the corresponding day. SC: non-diabetic sham control, NC: diabetic negative control (without treatment), VC: diabetic vehicle control, ST: treated with povidone-iodine as standard treatment, CE: treated group with CZ extract, AST: aspartate aminotransferase, ALT: alanine transaminase, TC: total cholesterol, and TG: triglyceride.

| **Groups** | **AST (U/L)** | | **ALT (U/L)** | | **TC (mg/dL)** | | **TC (mg/dL)** | |
| --- | --- | --- | --- | --- | --- | --- | --- | --- |
| **Day 3** | **Day 9** | **Day 3** | **Day 9** | **Day 3** | **Day 9** | **Day 3** | **Day 9** |
| SC | 270.67 ± 19.55a | 310.33 ± 9.35 b | 45.00 ± 3.06 c | 46.00 ± 3.46 d | 70.67 ± 4.48 e | 74.67 ± 3.34 f | 98.33 ± 1.45 g | 99.00 ± 1.73 h |
| NC | 596.33 ± 52.39 | 564.33 ± 54.27 | 226.67 ± 25.44 | 197.33 ± 36.32 | 137.63 ± 4.95 | 131.30 ± 3.58 | 202.27 ± 2.54 | 209.87 ± 2.60 |
| VC | 616.33 ± 39.86 | 716.67 ± 15.60 | 221.00 ± 40.20 | 215.67 ± 31.59 | 136.20 ± 4.52 | 138.37 ± 3.25 | 206.07 ± 2.60 | 198.97 ± 5.49 |
| ST | 627.00 ± 45.24 | 682.67 ± 54.33 | 198.00 ± 29.09 | 224.67 ± 2.40 | 130.07 ± 3.62 | 134.50 ± 2.65 | 201.23 ± 3.38 | 200.97 ± 2.02 |
| CE | 666.00 ± 28.75 | 478.00 ± 41.58 | 199.33 ± 28.88 | 256.00 ± 31.63 | 131.00 ± 2.65 | 130.33 ± 2.03 | 218.87 ± 17.07 | 200.80 ± 2.32 |

**Supplemental Figures**


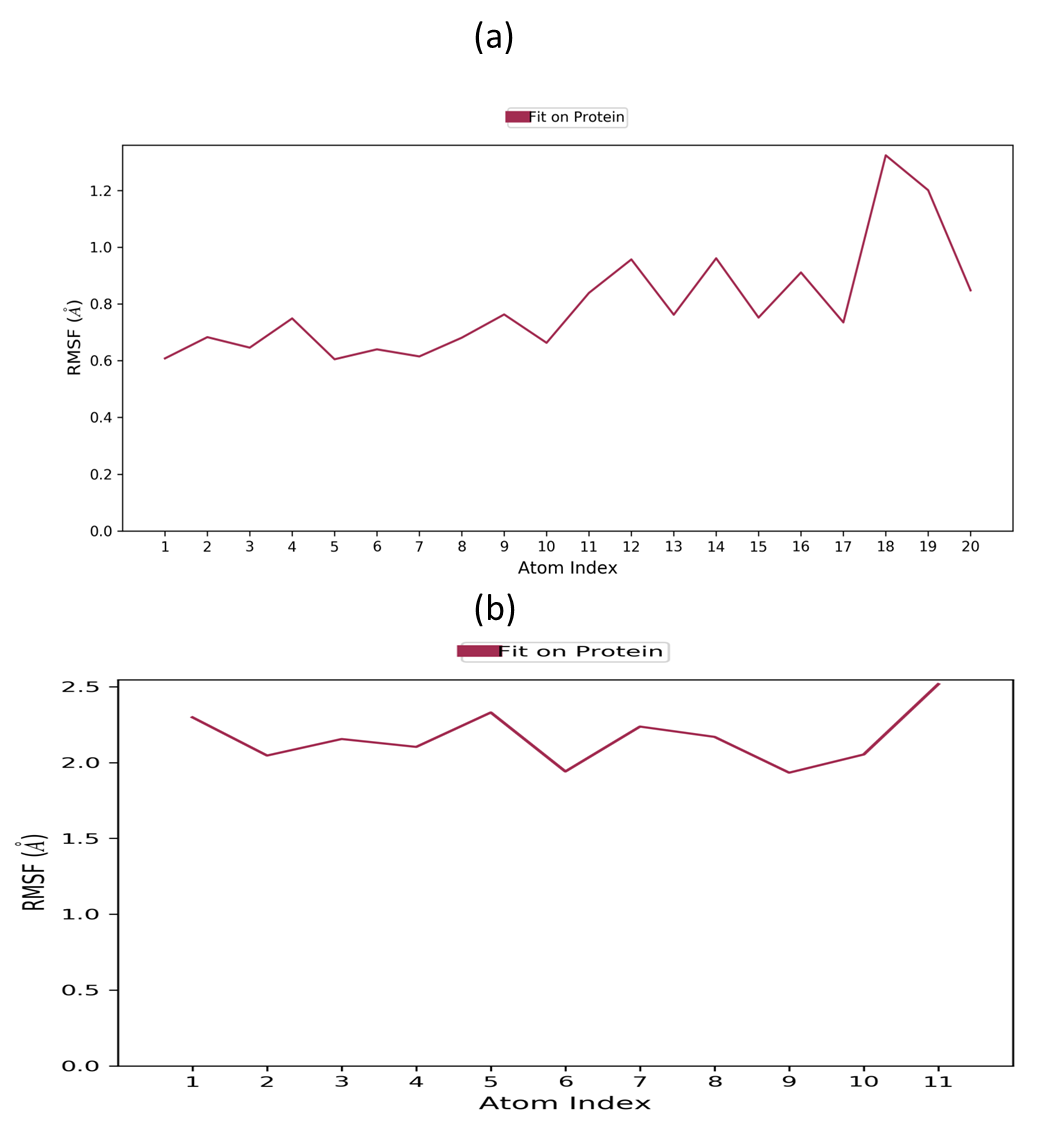


**Figure S1.** Trajectory plots of molecular dynamics (MD) of target protein-drug complex. Protein-root mean square fluctuation (P-RMSF) with respect to atom index during MD simulation of MMP8 complexed with xanthosine (a) and MMP9 complexed with methylquinoline (b) to figure 5.


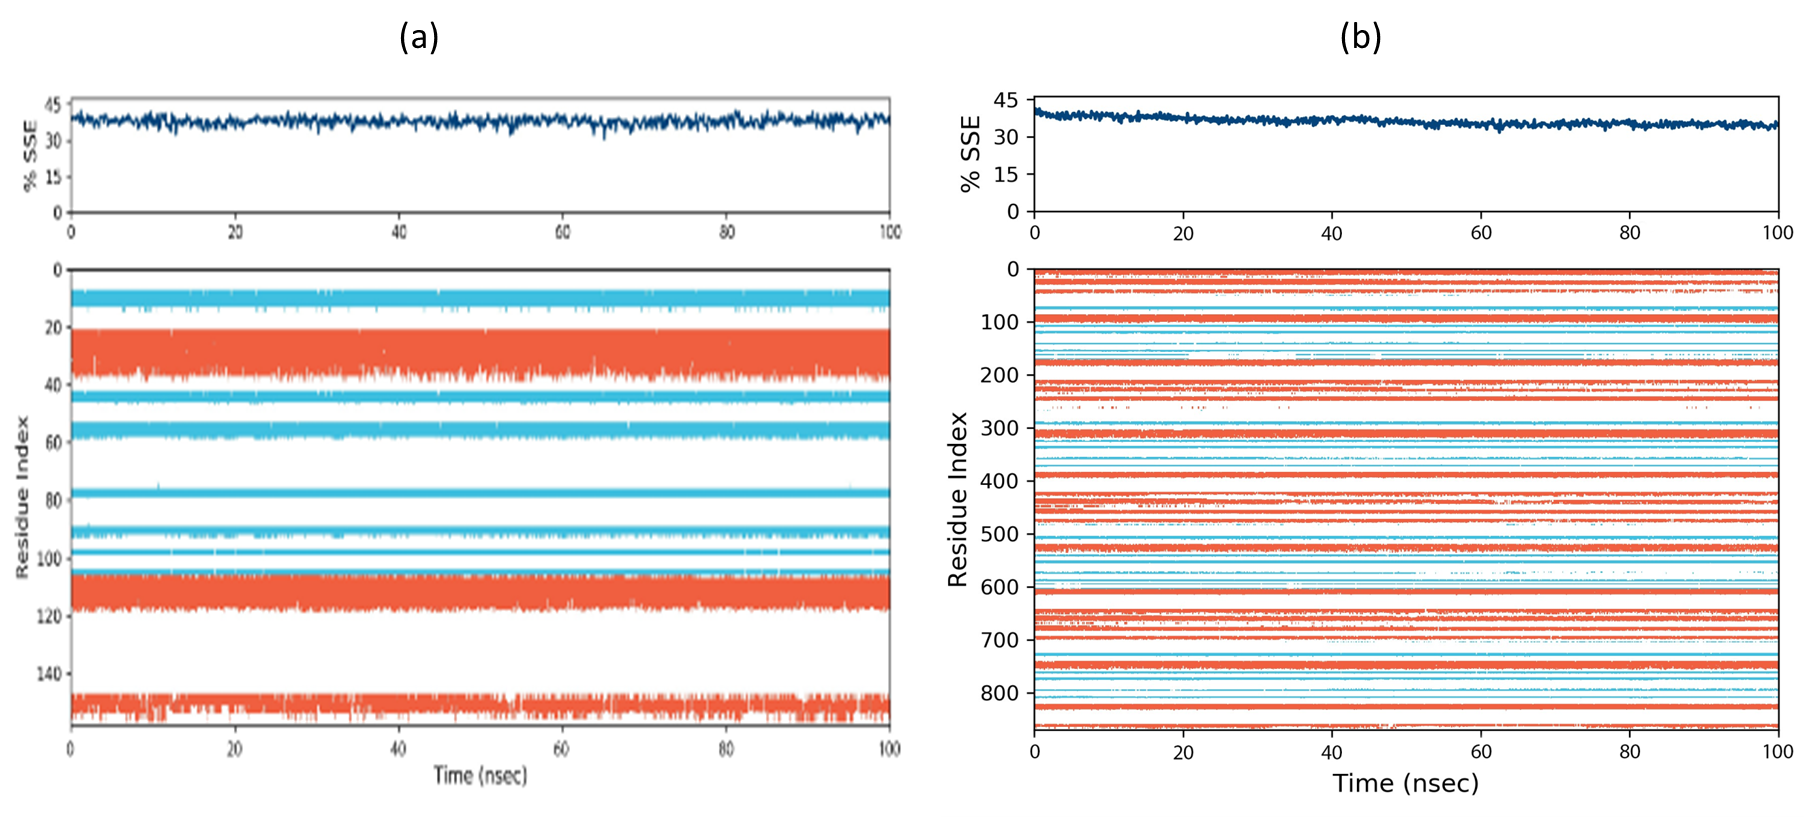


**Figure S2.** Protein secondary structure elements (SSE) such as alpha-helices and beta-strands are monitored throughout the simulation periods of MMP8 (a) and MMP9 (b).


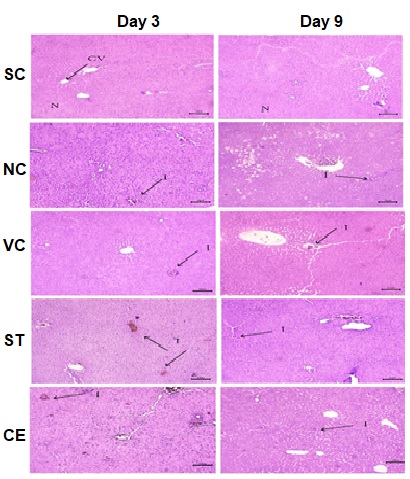


**Figure S3.** Histopathological view of liver tissue on post-wounded day 3 and day 9 by hematoxylin and eosin (H&E) staining of five experimental groups: SC, NC, VC, ST and CE. Pictures of stain are at 10x magnification. SC: non-diabetic sham control, NC: diabetic negative control (without treatment), VC: diabetic vehicle control, ST: treated with povidone-iodine as standard treatment, CE: treated group with CZ extract, CV: central vein, H: hepatocytes, I: inflammation, and N: normal liver structure. Bar scale: 100 µm.

**
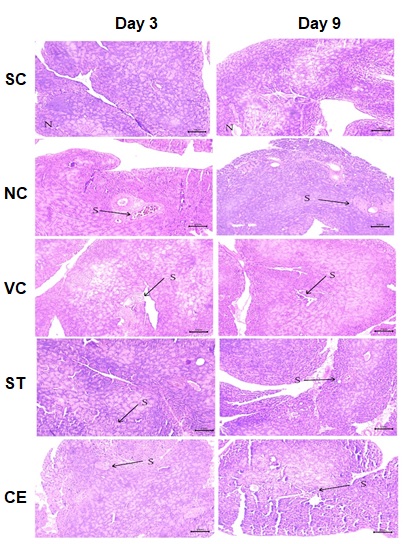
**

**Figure S4.** Histopathological view of pancreas tissue on post-wounded day 3 and day 9 by hematoxylin and eosin (H&E) staining of five experimental groups: SC, NC, VC, ST and CE. Pictures of stain are at 10x magnification. SC: non-diabetic sham control, NC: diabetic negative control (without treatment), VC: diabetic vehicle control, ST: treated with povidone-iodine as standard treatment, CE: treated group with CZ extract, N: normal pancreatic structure, and S: shrinkage of islets on Langerhans with degeneration. Bar scale: 100 µm.
